# Supplementary material
Source: PubMed Central journal article supplement (PMC4736839)
Supplement: 12_57_1.pdf [file 12_57_1.pdf]

## Supplementary Figure

(A) Query sequence:  
>tr|C3XTG3|C3XTG3\_BRAFL Putative uncharacterized protein (Fragment) OS=Branchiostoma floridae  
GN=BRAFLDRAFT\_219600

Alignment against  
>sp|Q9UJ37|SIA7B\_HUMAN Alpha-N-acetylgalactosaminide alpha-2,6-sialyltransferase 2 OS=Homo sapiens  
GN=ST6GALNAC2

Score: 666, E-value:  $4.0 \times 10^{-83}$   
Identity: 45.0%, Positives: 62.0%  
Query length: 317, Match length: 374  
Position: Q9UJ37 matches from 88 to 373 (286AA), in the query sequence from 22 to 305 (284AA)

|     |                                                               |     |        |
|-----|---------------------------------------------------------------|-----|--------|
| 22  | VPVLMWNEHINPDEYARLSQFKMNYGWGGIPYADIKNCLRHLNLSOHRYMFPGWTPDHTG  | 81  | C3XTG3 |
|     | +PVL+W + P + RLSQ K YGW+G+ + I + L LN S+ +F                   |     |        |
| 88  | IPVLLWGLDFTRPALWDRLSQHKAPYQWRGLSHQVIASTLSLLNGSESAKLFAAPRDTPPK | 147 | Q9UJ37 |
| 82  | CIRCAVVGNGGILRGSQKKEIDGHDFVWRVNSAIIEGYEEDVGKRTSFYFHDINTMKNS   | 141 | C3XTG3 |
|     | CIRCAVVGNGGILGS +G ID HD+V+R+N A+I+G+E DVG +TSFY +NTMKNS      |     |        |
| 148 | CIRCAVVGNGGILNGSROGPNIDAHDYVFRNLNGAVIKGFERDVGTKTSEYGFVNTMKNS  | 207 | Q9UJ37 |
| 142 | QAATKRFQYKHPQDKQTYVTTISSSIRDYVYFDAAISWKPVESGRDKSKAPPSOYGERP   | 201 | C3XTG3 |
|     | + G+ PQ +D Y I S IRDYV +AI PV G DK P + +G                     |     |        |
| 208 | LVSVMNLGFTSVPGQDLQYIFIPSDIRDYMLRSAILGVPVPEGLDKGDRPHAYFGPEA    | 267 | Q9UJ37 |
| 202 | ANTKFRMLHPDFMRYLKNFMDLSP--RRKGSNIYRPTTGGSMLLTALHTCDYTVYGFIT   | 259 | C3XTG3 |
|     | + +KF++LHPDF+ YL +L S ++Y P+TG MLLTALHTCD YGFIT               |     |        |
| 268 | SASKEKLLHPDEISYLTERFLKSKLINTHFGDLYMPTGALMLLALHTCDQVSAFYGFIT   | 327 | Q9UJ37 |
| 260 | EDHRQYNDHYESEWHKVFYANHDFOMEIEIWDKLDKAGLMKLYR                  | 305 | C3XTG3 |
|     | ++ +++DHY+E + ++FYANHD +E +W L KAG+++LY+                      |     |        |
| 328 | SNYWKFSDFYFERKMKPLIFYANHDLSEAAALWRDLHKAGILQLYQ                | 373 | Q9UJ37 |

(B) Query sequence  
>tr|C3YGC3|C3YGC3\_BRAFL Putative uncharacterized protein OS=Branchiostoma floridae  
GN=BRAFLDRAFT\_92867

Alignment against  
>sp|Q16842|SIA4B\_HUMAN CMP-N-acetylneuraminat-beta-galactosamide-alpha-2,3-sialyltransferase  
2 OS=Homo sapiens GN=ST3GAL2

Score: 827, E-value:  $5.0 \times 10^{-107}$   
Identity: 53.0%, Positives: 71.0%  
Query length: 355, Match length: 350  
Position: Q16842 matches from 72 to 350 (279AA), in the query sequence from 74 to 351 (278AA)

|     |                                                              |     |        |
|-----|--------------------------------------------------------------|-----|--------|
| 74  | CKR-IWCKGRSSWFDSRFDDNIRPVWSRANIELPADARKWMSLQGH-KDEDPAPLLNAL  | 131 | C3YGC3 |
|     | C+R + G S WFDS FD NI PVW+R N++LP D ++WWM LQ K + +L L         |     |        |
| 72  | CRRCMGDAGASDWFDSHFDGNTSPVWTRNMDLPPDVORWMMMLQPOFKSHNTNEVLEKL  | 131 | Q16842 |
| 132 | FDMGAPDVPWASRNLTGCLCAVVGNSGNLROANYGEEIDGYDLIFRMNDAPTIGWEKD   | 191 | C3YGC3 |
|     | F + P +P+ R+ C RCAVVGNSGNLR + YG+++DG++ I RMN APT G+E+D      |     |        |
| 132 | FQI-VPGENPYRFRDPHQRCRCAVVGNSGNLRGSGYGGDVGHNFIIRMNQAPTIVGFQD  | 190 | Q16842 |
| 192 | VGHRTHHFMPESATDLDDVSVFLLNFKPLDLKWKMTSLTDGSIIRTRWTRVKGRIKAN   | 251 | C3YGC3 |
|     | VG RTHHFMPESA +LP +VSVFL+ FK LDL W+ ++L+ G I T+ VK ++ +      |     |        |
| 191 | VGSRTTHHFMPESAKNLPANVSFVLVPFKVLDLLWIASALSTGQIRFTYAPVKSFRLRVD | 250 | Q16842 |
| 252 | KTKILVYNPAFFKYVNDKWTTEHHGRYSSTGSLVILFAVHVCDEVVYGYGADKLGNNWHY | 311 | C3YGC3 |
|     | K K+ +YNPAFFKY++D+WTEHHGRY STG LV+ FA+HVCDEV+VYG+GAD GNW+HY  |     |        |
| 251 | KEKVQIYNPAFFKYIHDRWTEHHGRYPSTGMLVLFALHVCDEVVYGYGADSRGNWHHY   | 310 | Q16842 |
| 312 | WTHYSGAHRSTGVHDSEFERVLLKLOSEGIIKIHRCGN                       | 351 | C3YGC3 |
|     | W + R TGVHD+FE +++ L I+++RGN                                 |     |        |
| 311 | WENNRVAGEFRKTGVHDADFEAHIIDMLAKASKIEVYRGN                     | 350 | Q16842 |

Supplementary Figure S1 Putative ST3Gal and ST6GalNac family proteins in *Branchiostoma floridae*.

Unannotated sialyltransferases were searched for using BLAST search where the *B. floridae* proteome dataset were queried with human sialyltransferases. In four sialyltransferase families, *B. floridae* proteins that shared the highest homology with each human sialyltransferase were extracted as putative homologous sialyltransferases. All the members of the ST6GalNac family (A) and ST3Gal family (B) lacked an intrinsic protein name and gene name. *B. floridae* C3XTG3 and C3YGC3 proteins had the lowest E-values in the ST6GalNac family (A) and ST3Gal family (B), respectively.
