# Supplementary material
Source: PubMed Central journal article supplement (PMC4736839)
Supplement: 12_57_4.pdf [file 12_57_4.pdf]

**Supplementary Table S3.** Phylogenetic profiles of glycosyltransferases among ascidians. A total of 35 GTs being lost either in each ascidian or in both ascidians were listed in the table. In the right columns, proteins homologous to the human GTs and functionally-linked glycan synthetic enzymes in the genomes of ascidians were coded as 1 (present) or 0 (absent). Other 138 GTs, which were present in both ascidians, were omitted in this table. GTs being lost in both ascidians comprised mainly Class 1 GTs

| Human Glycosyltransferases |            |                                                                        |                                                                                                                                                                        |                                                       |                 |      | Ascidians' phylogenetic profile |                       |
|----------------------------|------------|------------------------------------------------------------------------|------------------------------------------------------------------------------------------------------------------------------------------------------------------------|-------------------------------------------------------|-----------------|------|---------------------------------|-----------------------|
|                            | UniProt ID | Gene Names                                                             | Protein Names                                                                                                                                                          | Categories of Glycan                                  | Localization    | CAZy | <i>Ciona intestinalis</i>       | <i>Ciona savignyi</i> |
| Class 1                    | Q8N5D6     | GBGT1                                                                  | Globoside $\alpha$ -1,3- <i>N</i> -acetylgalactosaminyltransferase 1                                                                                                   | Glycosphingolipid                                     | Golgi apparatus | GT6  | 0                               | 0                     |
|                            | P16442     | ABO                                                                    | Histo-blood group ABO system transferase                                                                                                                               | Glycosphingolipid                                     | Golgi apparatus | GT6  | 0                               | 0                     |
|                            | P19526     | FUT1                                                                   | Galactoside 2- $\alpha$ -L-fucosyltransferase 1                                                                                                                        | Glycosphingolipid                                     | Golgi apparatus | GT11 | 0                               | 0                     |
|                            | Q10981     | FUT2                                                                   | Galactoside 2- $\alpha$ -L-fucosyltransferase 2                                                                                                                        | Glycosphingolipid                                     | Golgi apparatus | GT11 | 0                               | 0                     |
|                            | Q00973     | B4GALNT1                                                               | $\beta$ -1,4 <i>N</i> -acetylgalactosaminyltransferase 1                                                                                                               | Glycosphingolipid                                     | Golgi apparatus | GT12 | 0                               | 0                     |
|                            | Q8NHY0     | B4GALNT2                                                               | $\beta$ -1,4 <i>N</i> -acetylgalactosaminyltransferase 2                                                                                                               | <i>O</i> -Glycan, <i>N</i> -Glycan, Glycosphingolipid | Golgi apparatus | GT12 | 0                               | 0                     |
|                            | Q09327     | MGAT3                                                                  | $\beta$ -1,4-mannosyl-glycoprotein 4- $\beta$ - <i>N</i> -acetylglucosaminyltransferase                                                                                | <i>N</i> -Glycan                                      | Golgi apparatus | GT17 | 0                               | 0                     |
|                            | Q92186     | ST8SIA2                                                                | $\alpha$ -2,8-sialyltransferase 8B (SIAT8-B) (ST8SiaII) (STX)                                                                                                          | <i>N</i> -Glycan                                      | Golgi apparatus | GT29 | 0                               | 1                     |
|                            | O15466     | ST8SIA5                                                                | $\alpha$ -2,8-sialyltransferase 8E (SIAT8-E) (ST8SiaV)                                                                                                                 | Glycosphingolipid                                     | Golgi apparatus | GT29 | 0                               | 1                     |
|                            | Q8NDV1     | ST6GALNAC3                                                             | $\alpha$ - <i>N</i> -acetylgalactosaminide $\alpha$ -2,6-sialyltransferase 3 (ST6GalNAcIII) (SIAT7-C)                                                                  | Glycosphingolipid                                     | Golgi apparatus | GT29 | 0                               | 0                     |
|                            | Q9BVH7     | ST6GALNAC5                                                             | $\alpha$ - <i>N</i> -acetylgalactosaminide $\alpha$ -2,6-sialyltransferase 5 (ST6GalNAcV) (SIAT7-E)                                                                    | Glycosphingolipid                                     | Golgi apparatus | GT29 | 0                               | 0                     |
|                            | Q969X2     | ST6GALNAC6                                                             | $\alpha$ - <i>N</i> -acetylgalactosaminide $\alpha$ -2,6-sialyltransferase 6 (ST6GalNAcVI) (SIAT7-F)                                                                   | Glycosphingolipid                                     | Golgi apparatus | GT29 | 0                               | 0                     |
|                            | Q92185     | ST8SIA1                                                                | $\alpha$ - <i>N</i> -acetylneuraminide $\alpha$ -2,8-sialyltransferase (Ganglioside GD3 synthase) (SIAT8-A)                                                            | Glycosphingolipid                                     | Golgi apparatus | GT29 | 0                               | 0                     |
|                            | Q9H4F1     | ST6GALNAC4                                                             | $\alpha$ - <i>N</i> -acetylneuraminyl-2,3- $\beta$ -galactosyl-1,3- <i>N</i> -acetyl-galactosaminide $\alpha$ -2,6-sialyltransferase (ST6GalNAcIV) (SIAT3-C) (SIAT7-D) | Glycosphingolipid                                     | Golgi apparatus | GT29 | 0                               | 0                     |
|                            | P15907     | ST6GAL1                                                                | $\beta$ -galactoside $\alpha$ -2,6-sialyltransferase 1 (ST6GalI)                                                                                                       | <i>O</i> -Glycan, <i>N</i> -Glycan                    | Golgi apparatus | GT29 | 0                               | 0                     |
|                            | Q92187     | ST8SIA4                                                                | CMP- <i>N</i> -acetylneuraminyl-poly- $\alpha$ -2,8-sialyltransferase (SIAT8-D) (ST8SiaIV)                                                                             | <i>N</i> -Glycan                                      | Golgi apparatus | GT29 | 0                               | 1                     |
|                            | Q9UNA3     | A4GNT                                                                  | $\alpha$ -1,4- <i>N</i> -acetylglucosaminyltransferase                                                                                                                 | <i>O</i> -Glycan                                      | Golgi apparatus | GT32 | 0                               | 0                     |
|                            | Q9NPC4     | A4GALT                                                                 | Lactosylceramide 4- $\alpha$ -galactosyltransferase                                                                                                                    | Glycosphingolipid                                     | Golgi apparatus | GT32 | 0                               | 0                     |
|                            | Q8NAT1     | POMGNT2                                                                | Glycosyltransferase-like domain-containing protein 2                                                                                                                   | <i>O</i> -Glycan                                      | Extracellular   | GT61 | 0                               | 0                     |
|                            | O94777     | DPM2                                                                   | Dolichol phosphate-mannose biosynthesis regulatory protein                                                                                                             | <i>N</i> -Glycan, GPI                                 | Endoplasmic     | -    | 0                               | 0                     |
|                            | Q9P2X0     | DPM3                                                                   | Dolichol-phosphate mannosyltransferase subunit 3                                                                                                                       | <i>N</i> -Glycan                                      | Endoplasmic     | -    | 0                               | 0                     |
|                            | P0C6T2     | OST4                                                                   | Dolichyl-diphosphooligosaccharide—protein glycosyltransferase subunit 4                                                                                                | <i>N</i> -Glycan                                      | Endoplasmic     | -    | 1                               | 0                     |
|                            | Q3MUY2     | PIGY                                                                   | Phosphatidylinositol <i>N</i> -acetylglucosaminyltransferase subunit Y                                                                                                 | GPI anchor                                            | Endoplasmic     | -    | 0                               | 0                     |
| Q8TBF5                     | PIGX       | Phosphatidylinositol-glycan biosynthesis class X protein               | GPI anchor                                                                                                                                                             | Endoplasmic                                           | -               | 0    | 0                               |                       |
| Q14442                     | PIGH       | Phosphatidylinositol <i>N</i> -acetylglucosaminyltransferase subunit H | GPI anchor                                                                                                                                                             | reticulum, Cytoplasm, Mitochondria,                   | -               | 0    | 0                               |                       |
| Class 2                    | Q16880     | UGT8                                                                   | 2-hydroxyacylsphingosine 1- $\beta$ -galactosyltransferase                                                                                                             | Glycosphingolipid                                     | -               | GT1  | 0                               | 0                     |
|                            | Q10469     | MGAT2                                                                  | $\alpha$ -1,6-mannosyl-glycoprotein 2- $\beta$ - <i>N</i> -acetylglucosaminyltransferase                                                                               | <i>N</i> -Glycan                                      | Golgi apparatus | GT16 | 1                               | 0                     |
|                            | Q96L58     | B3GALT6                                                                | $\beta$ -1,3-galactosyltransferase 6                                                                                                                                   | Proteoglycan                                          | Golgi apparatus | GT31 | 0                               | 1                     |
|                            | Q96EU7     | C1GALT1C1                                                              | C1GALT1-specific chaperone 1                                                                                                                                           | <i>O</i> -Glycan                                      | Golgi apparatus | GT31 | 0                               | 1                     |
| Class 3                    | Q86VD9     | PIGZ                                                                   | GPI mannosyltransferase 4                                                                                                                                              | GPI anchor                                            | Endoplasmic     | GT22 | 0                               | 1                     |
|                            | Q9BT22     | ALG1                                                                   | Chitobiosyldiphosphodolichol b-mannosyltransferase                                                                                                                     | <i>N</i> -Glycan                                      | Endoplasmic     | GT33 | 1                               | 0                     |
|                            | Q9H3S5     | PIGM                                                                   | GPI mannosyltransferase 1                                                                                                                                              | GPI anchor                                            | Endoplasmic     | GT50 | 0                               | 1                     |
|                            | Q92535     | PIGC                                                                   | Phosphatidylinositol <i>N</i> -acetylglucosaminyltransferase subunit C                                                                                                 | GPI anchor                                            | Endoplasmic     | -    | 0                               | 1                     |
|                            | P57054     | PIGP                                                                   | Phosphatidylinositol <i>N</i> -acetylglucosaminyltransferase subunit P                                                                                                 | GPI anchor                                            | Endoplasmic     | -    | 1                               | 0                     |
|                            | Q9BRB3     | PIGQ                                                                   | Phosphatidylinositol <i>N</i> -acetylglucosaminyltransferase subunit Q                                                                                                 | GPI anchor                                            | Endoplasmic     | -    | 1                               | 0                     |
